# Supplementary material for: Expedient synthesis of 1,6-anhydro-α-D-galactofuranose, a useful intermediate for glycobiological tools
Source: publisher site journal article supplement (doi:10.3762/bjoc.10.172), 2014-07-21

## Supporting Information

for

Expedient synthesis of 1,6-anhydro- $\alpha$ -D-galactofuranose, a useful intermediate for glycobiological tools

Luciana Baldoni and Carla Marino\*

Address: CIHIDECAR-CONICET-UBA, Departamento de Química Orgánica, Facultad de Ciencias Exactas y Naturales, Universidad de Buenos Aires, Pabellón II, Ciudad Universitaria, 1428 Buenos Aires, Argentina, Tel/Fax: +54-11-45763352

E-mail: Carla Marino - [cmarino@qo.fcen.uba.ar](mailto:cmarino@qo.fcen.uba.ar)

\*Corresponding author

**$^1\text{H}$  and  $^{13}\text{C}$  NMR spectra of compounds 2 and 12**

## Content

|                                                                                           |    |
|-------------------------------------------------------------------------------------------|----|
| $^1\text{H}$ NMR spectrum of compound <b>12</b> (500 MHz, $\text{CDCl}_3$ ).....          | S3 |
| $^{13}\text{C}$ NMR spectrum of compound <b>12</b> (125.8 MHz, $\text{CDCl}_3$ ).....     | S4 |
| $^1\text{H}$ NMR spectrum of compound <b>2</b> (500 MHz, $\text{D}_2\text{O}$ ).....      | S5 |
| $^{13}\text{C}$ NMR spectrum of compound <b>2</b> (125.8 MHz, $\text{D}_2\text{O}$ )..... | S6 |

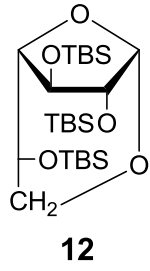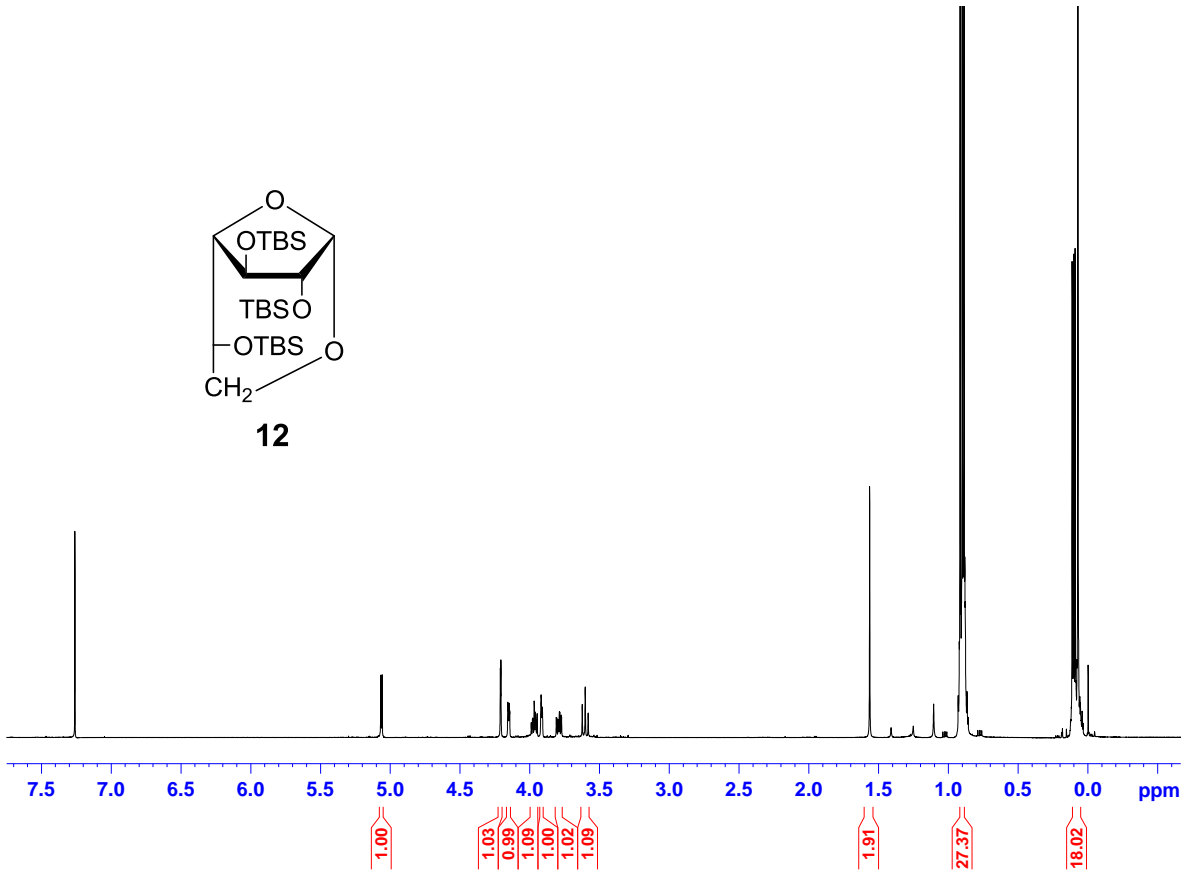

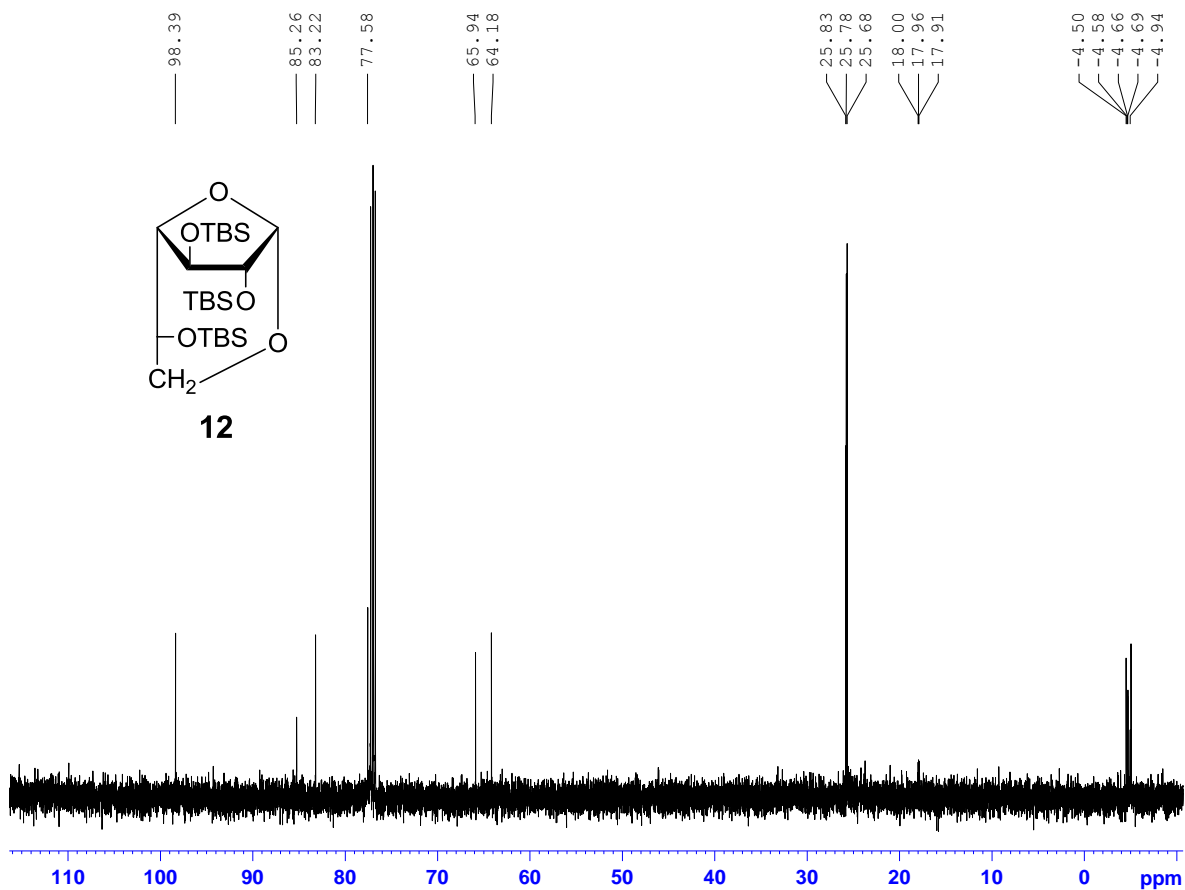

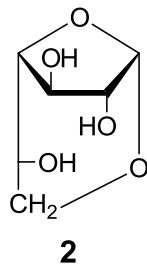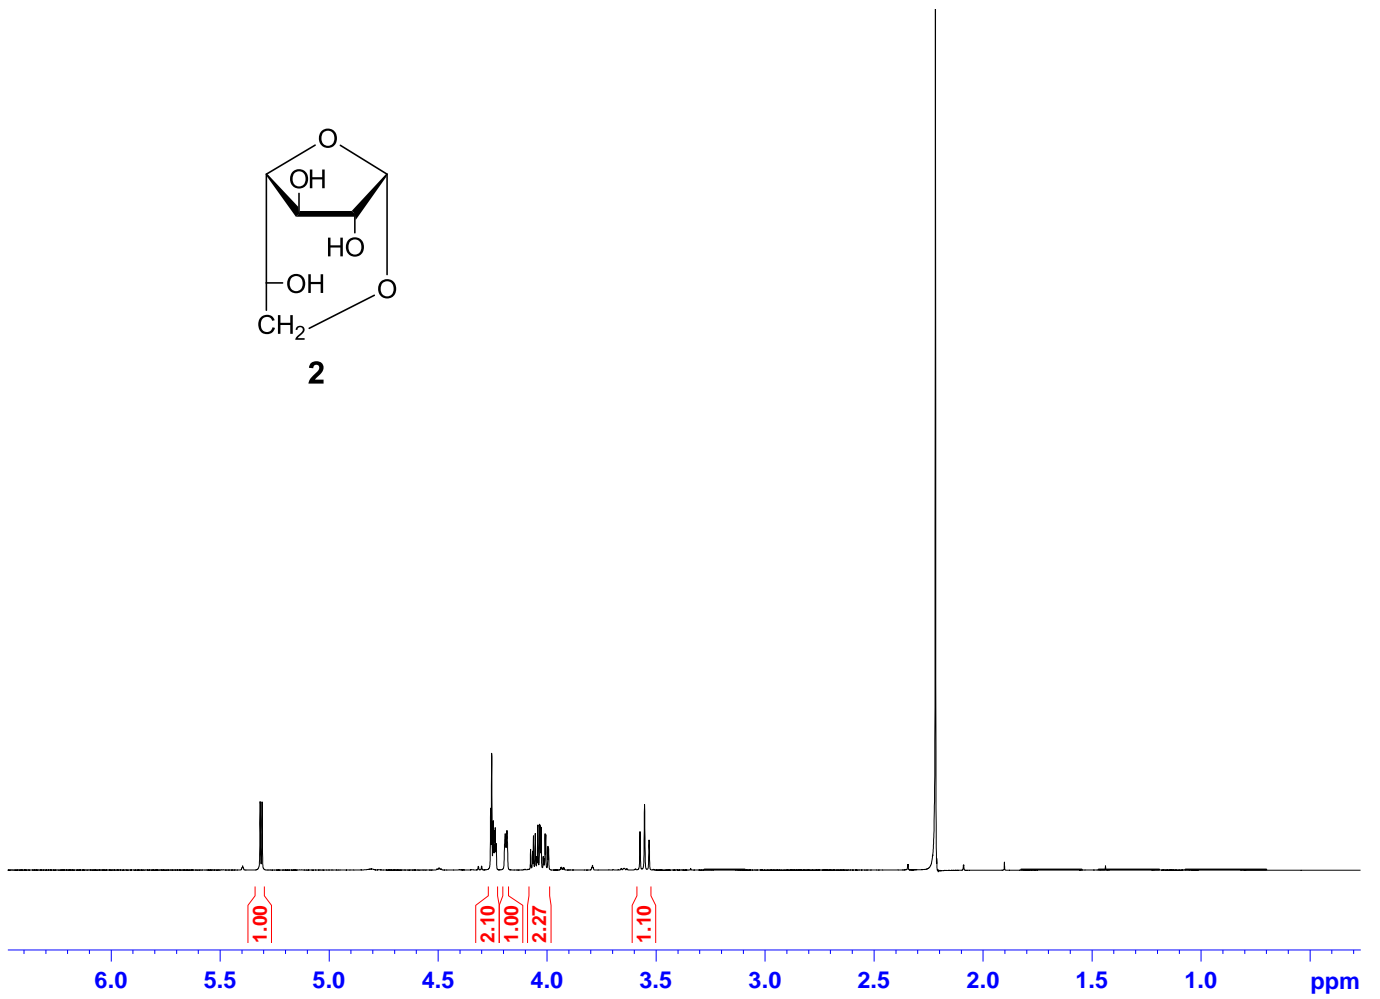

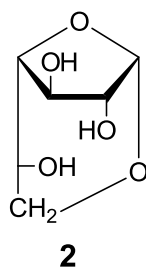

— 98.61  
— 85.20  
— 80.73  
— 75.27  
— 65.33  
— 62.60

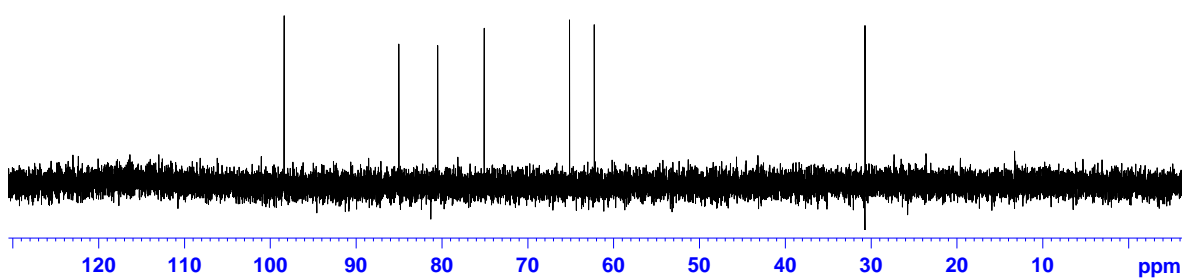

Supplement: Additional file 1 [file 1860-5397-10-172-S1.pdf]
